# Supplementary material for: Hierarchically porous Co–N–C catalysts derived from metal–tetrazole frameworks for efficient oxygen reduction
Source: Royal Society of Chemistry journal article supplement (doi:10.1039/d5cc01337b), 2025-01-01
Supplement: d5cc01337b1.pdf [file d5cc01337b1.pdf]

## Supporting Information

Hierarchically porous Co-N-C catalysts derived from metal-tetrazole frameworks for efficient oxygen reduction

## S1. Experimental Section

All reagents were analytical grade and used without further purification. All solutions used in electrochemical experiments were prepared with Millipore water ( $\geq 18\text{ M}\Omega$ ).

### Synthesis of Co-4ptz

Add 4-(5-tetrazolyl)pyridine (51.3 mg, 0.35 mmol) and  $\text{Co}(\text{OAc})_2 \cdot 4\text{H}_2\text{O}$  (49.5 mg, 0.2 mmol) into 2.5 mL of deionized water separately, and ultrasonically disperse each for 10 minutes. Then, slowly pour the  $\text{Co}(\text{OAc})_2 \cdot 4\text{H}_2\text{O}$  aqueous solution into the dispersion of 4-(5-tetrazolyl)pyridine while stirring at 1000 rpm for 30 min. Next, transfer the mixed solution into a 25 mL autoclave and conduct a hydrothermal reaction in an oven at  $180\text{ }^\circ\text{C}$  for 24 h. After the reaction is complete, wash and dry the product to obtain pink crystals (Co-4ptz). During this process, the molar ratio of metal ions to 4-(5-tetrazolyl)pyridine is 0.57, with a drying temperature of  $110\text{ }^\circ\text{C}$  and a drying time of 12 h. IR (KBr,  $\text{cm}^{-1}$ ): 3159.69 (m), 1602.56 (s), 1561.49 (w), 1453.26 (m), 1446.40 (s), 1387.02 (m), 1312.84 (w), 1254.56 (w), 1145.62 (w), 1014.76 (m), 723.75 (s).

### Synthesis of Co-4ptz-K-M-800

Weigh 20 mg of Co-4ptz prepared earlier and 6 mg of Ketjenblack (KB), grind them together, and place the mixture downstream in a ceramic boat. Simultaneously, weigh 200 mg of melamine (M) and place it upstream in the ceramic boat. Under an argon atmosphere, heat the setup at a rate of  $5\text{ }^\circ\text{C}/\text{min}$  to a temperature of  $800\text{ }^\circ\text{C}$  and maintain this temperature for 2 h. After cooling to room temperature, a cobalt and nitrogen co-doped porous carbon-based oxygen reduction electrocatalyst (Co-ptz-K-M-800) is obtained, derived from Co-4ptz. When the amount of KB was tailored to 20, 30, and 40% of the mass of Co-4ptz, the corresponding products were marked as Co-4ptz-K(4)-M-800, Co-4ptz-K(6)-M-800 (Co-ptz-K-M-800), and Co-4ptz-K(8)-M-800, respectively.

### Synthesis of Co-4ptz-K-800 and Co-4ptz-800

The operating conditions for Co-4ptz-K-800 are the same as Co-4ptz-K-M-800, except that melamine was not introduced. The operating conditions for Co-4ptz-800 are the same as Co-4ptz-K-M-800, except that melamine and KB were not introduced.

## Characterizations

Powder X-Ray diffraction (PXRD) patterns were recorded on a D8 DAVINCI X-ray powder diffractometer equipped with graphite monochromatized Cu K $\alpha$  radiation ( $\lambda = 1.5406 \text{ \AA}$ ). The diffractometer was operated with working voltage and current of 40 kV and 40 mA, respectively. Transmission electron microscopy (TEM) and high-resolution TEM (HRTEM) images were recorded on a JEM-2100 apparatus working at an accelerating voltage of 200 kV. Scanning electron microscopy (SEM) was carried out with a S-4800 (JEOL) apparatus working at an acceleration voltage of 2 kV. X-ray photon spectroscopy (XPS) was performed on an ESCA Lab250 X-ray microprobe corrected by C1s peak at 284.6 eV. Nitrogen sorption experiments and pore size distribution (PSD) were measured using an ASAP 2020 surface area detecting instrument by N<sub>2</sub> physisorption at 77 K. Prior to the measurement, the samples were degassed at 120°C for 6 h.

## Electrochemical Measurements

All electrochemical experiments were conducted on a CHI 760 E electrochemical station (Shanghai Chenhua Co., China) in a standard three electrode cell in O<sub>2</sub>-saturated 0.1 M KOH at room temperature. A glassy carbon electrode (GCE, 5 mm in diameter), a saturated calomel electrode (SCE), and a Pt wire were used as the working, reference and counter electrode, respectively. All electrode potentials were expressed in reference to the reversible hydrogen electrode (RHE). 5 mg of the catalysts were dispersed in 1 mL of 1:1 v/v water/alcohol with 40  $\mu\text{L}$  Nafion by sonication to form a homogeneous suspension. Typically, 5  $\mu\text{L}$  well-dispersed suspension was dropped on the glassy carbon electrode and then dried in an ambient environment for measurements. Linear sweep voltammetry (LSV) was tested with a scan rate of 10 mV s<sup>-1</sup> at 1600 rpm on rotating disc electrode (RDE). The chronoamperometry (CA) was tested at an overpotential of 0.8 V vs RHE after equilibrium. Calibrate the SCE electrode: During calibration, select a specific range near the open-circuit voltage for cyclic voltammetry (CV) testing. The CV scan rate should be as slow as possible, typically 1 mV/s, to ensure the reaction system is in equilibrium. Choose the two electrode potentials corresponding to the zero current density, take their average, which will be the corrected reference electrode potential value.

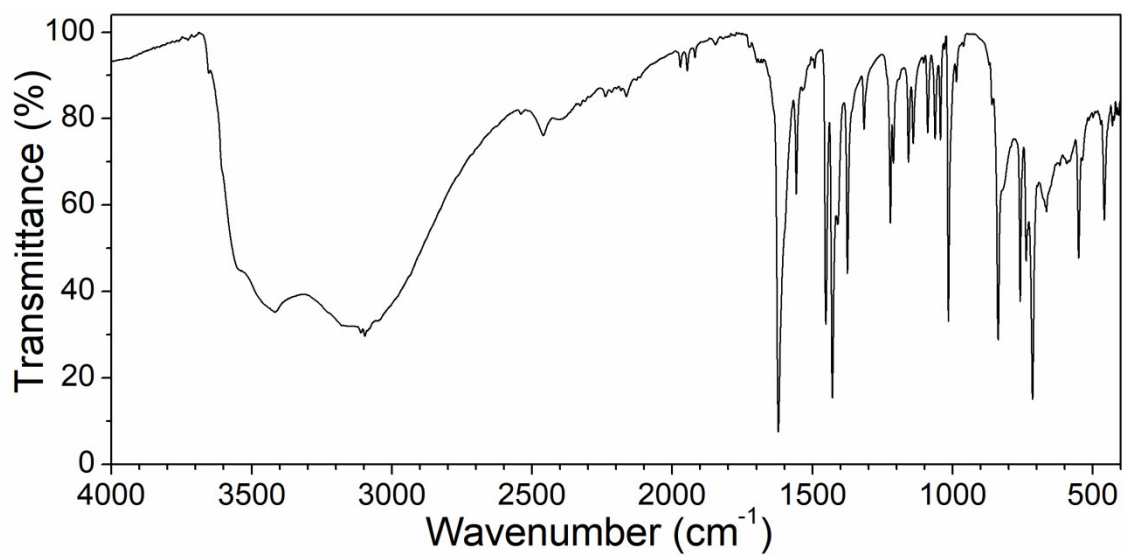

**Fig. S1.** FTIR image of Co-4ptz.

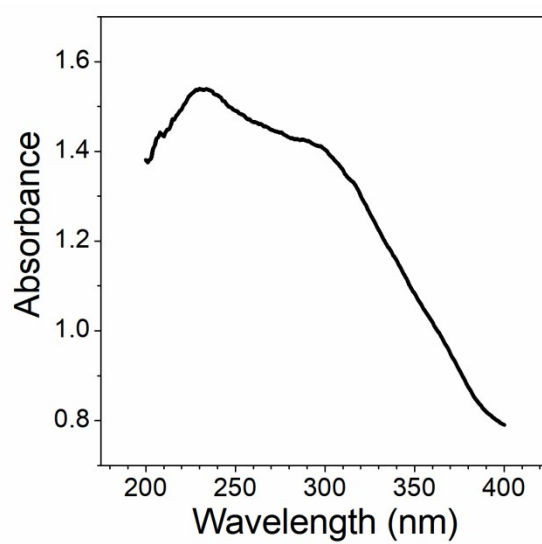

**Fig. S2.** UV spectrum image of Co-4ptz.

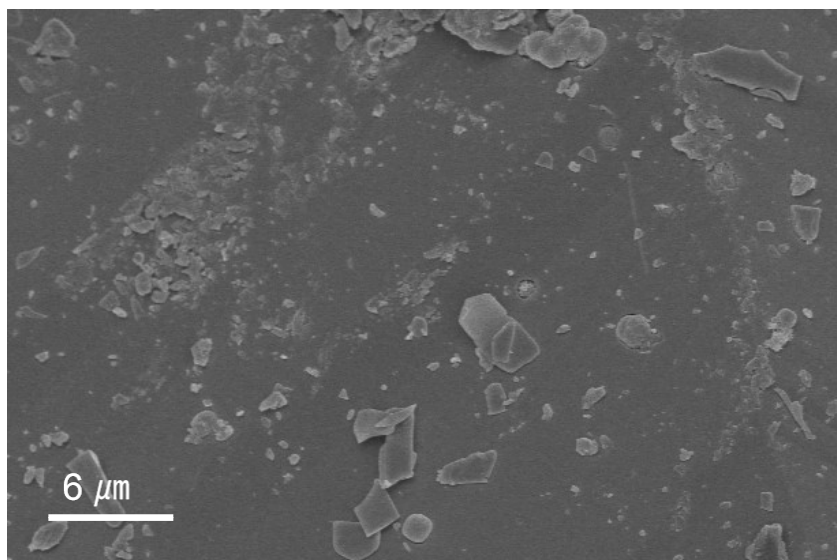

**Fig. S3.** SEM image of Co-4ptz.

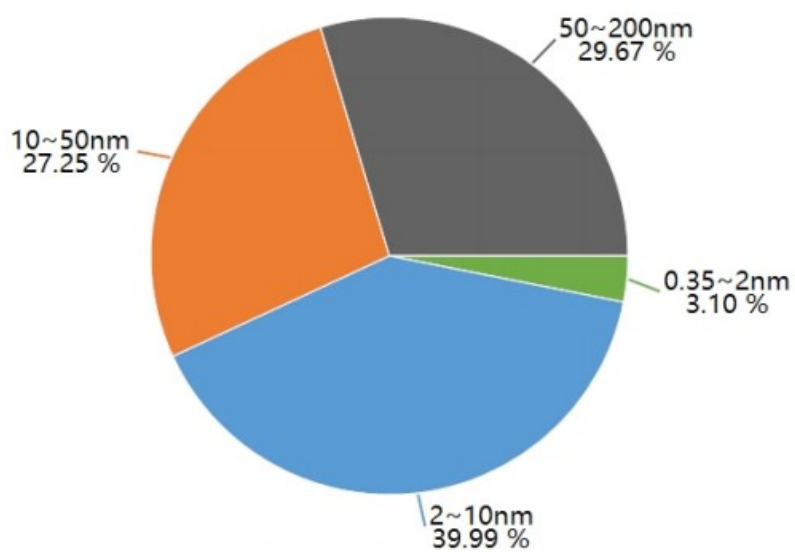

**Fig. S4.** Pore volume distribution diagram of Co-4ptz-K-M-800.

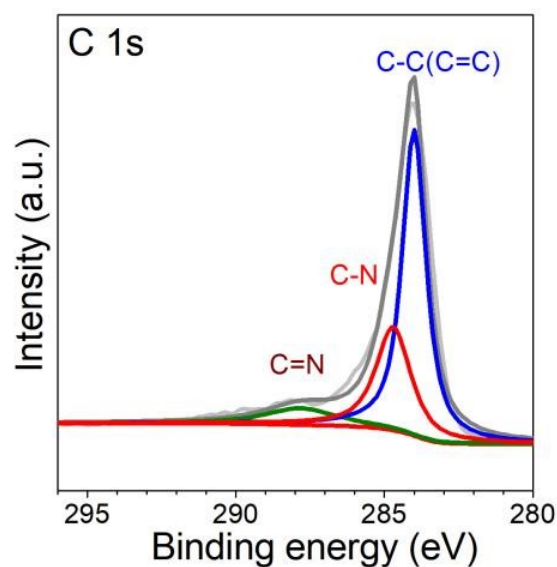

**Fig. S5** XPS spectrum of C 1s of Co-4ptz-K-M-800.

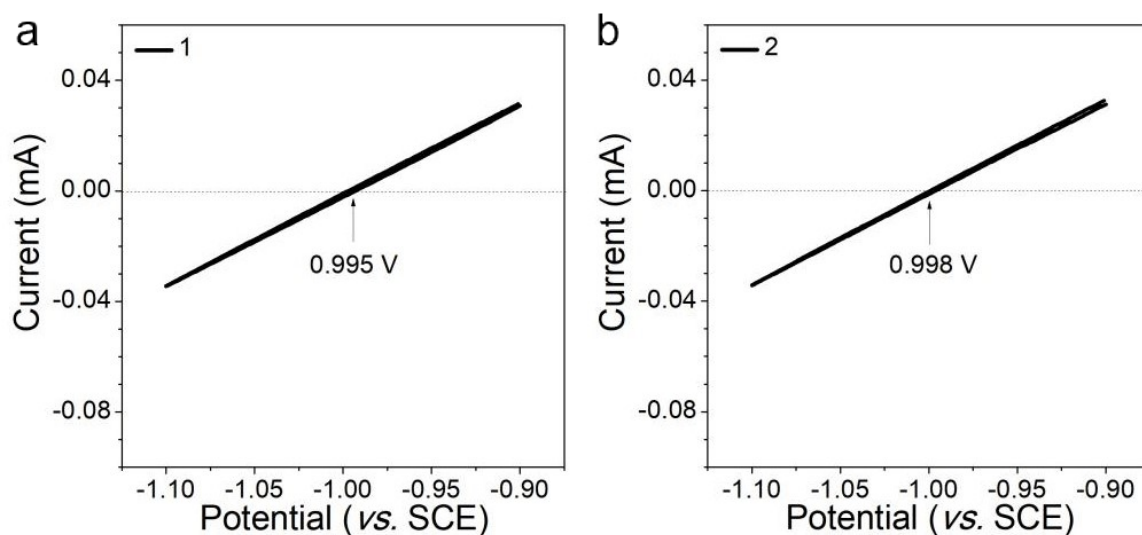

**Fig. S6** (a) 1<sup>st</sup> and (b) 2<sup>nd</sup> cycle CV curves of SCE electrode calibration in 0.1 M KOH at 20 °C.

As shown in Fig. S8a, the SCE electrode was calibrated in 0.1 M KOH, resulting in a difference of 0.995 V between RHE and the calomel electrode potential after calibration. The second test yielded 0.998 V, with an average of 0.997 V. Therefore, in this paper,  $E(\text{RHE}) = E(\text{SCE}) + 0.997 \text{ V}$ .

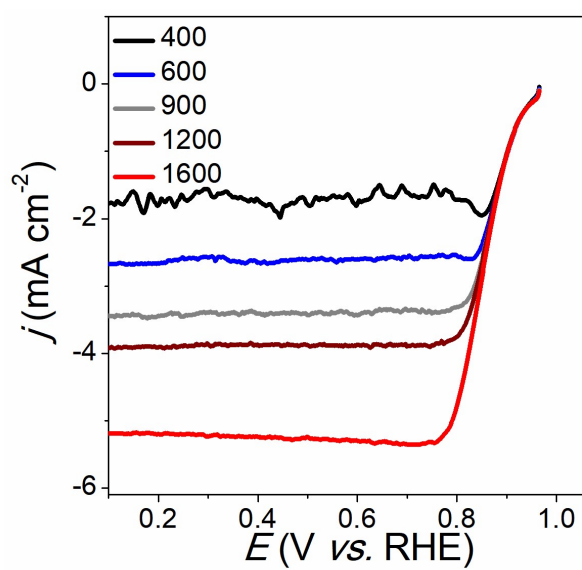

**Fig. S7** LSV curves of Co-4ptz-K-M-800 at different rotation rates.

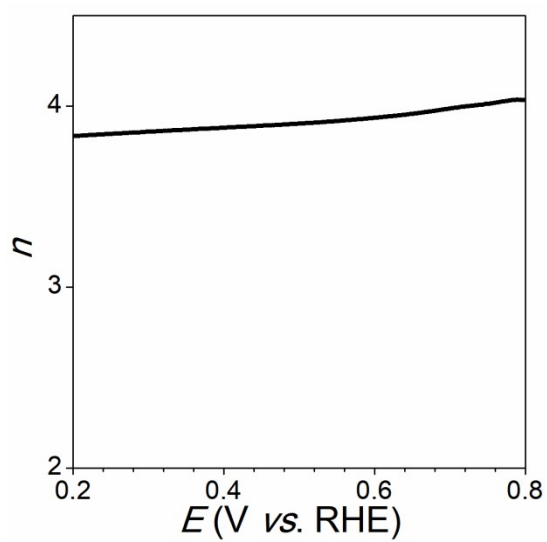

**Fig. S8** The electron transfer number ( $n$ ) of Co-4ptz-K-M-800.

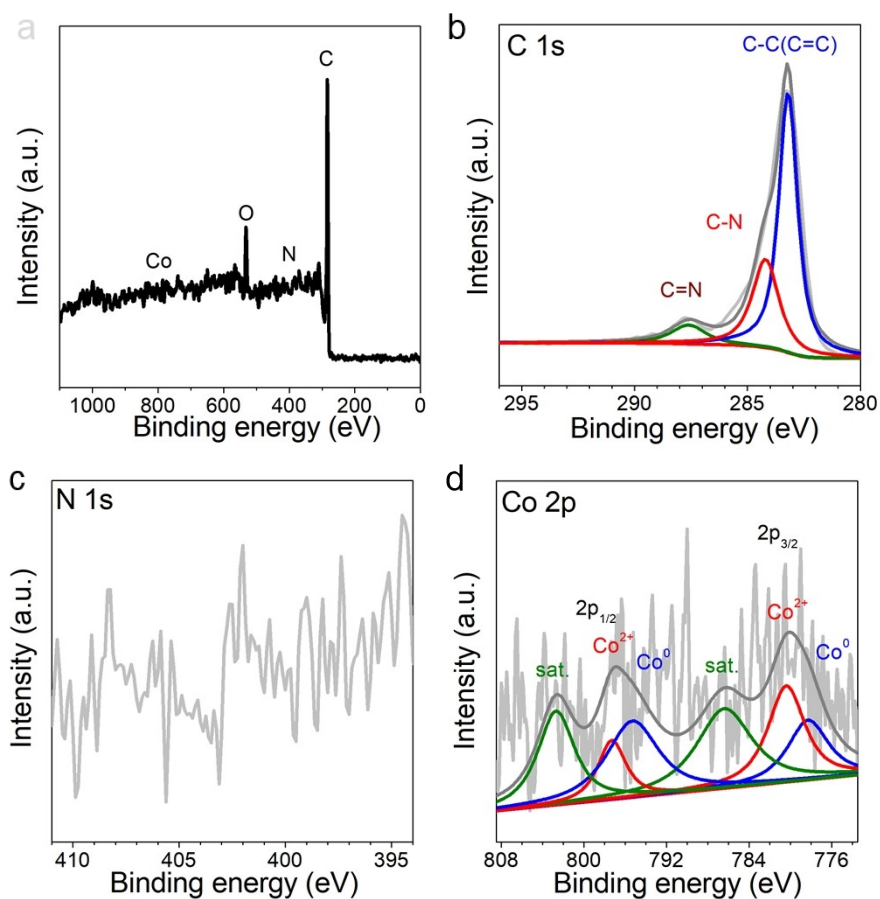

**Fig. S9** XPS spectra of full (a), C 1s (b), N 1s (c) and Co (d) of Co-4ptz-K-800.

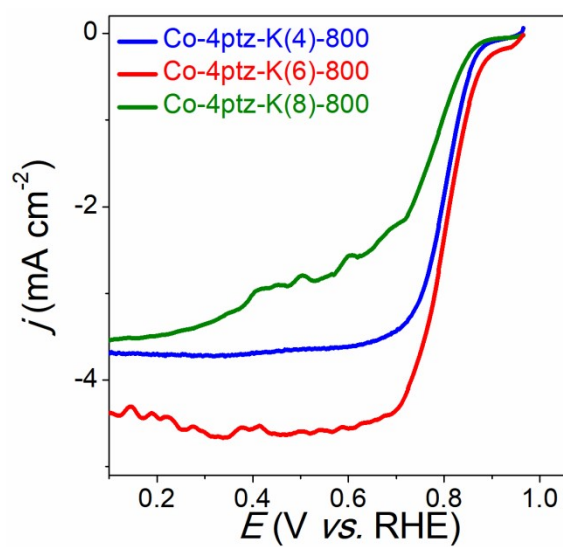

**Fig. S10** LSV curves of Co-4ptz-K(4)-M-800, Co-4ptz-K(6)-M-800 and Co-4ptz-K(8)-M-800.



**Table S1.** Comparison of ORR catalytic performances of reported Co-containing catalysts in 0.1 M KOH solution.

| Catalysts                    | $E_{1/2}$ [V] | Reference                                                          |
|------------------------------|---------------|--------------------------------------------------------------------|
| <b>Co-4ptz-K-M-800</b>       | <b>0.858</b>  | <b>This work</b>                                                   |
| CoP/HNBs@NCL-2               | 0.88          | <i>Chem. Eng. J.</i> , <b>2023</b> , 475, 146154.                  |
| ZnCo <sub>2</sub> @NCNTs-800 | 0.85          | <i>Chem. Eng. J.</i> , <b>2022</b> , 429, 132199.                  |
| Co/NHCB                      | 0.84          | <i>Adv. Funct. Mater.</i> , <b>2024</b> , 2415326.                 |
| Co@hNCTs                     | 0.87          | <i>Nano Energy</i> , <b>2020</b> , 71, 104592.                     |
| H-Co@FeCo/N/C                | 0.91          | <i>Appl. Catal. B Environ. Energy</i> , <b>2020</b> , 278, 119259. |
| CoSAs@NC-920                 | 0.882         | <i>Chem. Eng. J.</i> , <b>2024</b> , 495, 153670.                  |
| CoSA/NPC                     | 0.87          | <i>J. Mater. Chem. A</i> , <b>2021</b> , 9, 22643-22652.           |
| CoFe@NC/KB-800               | 0.845         | <i>Chem. Eng. J.</i> , <b>2022</b> , 427, 131614.                  |

**Table S2.** The performance of liquid Zn-air batteries with various ORR electrocatalysts reported in literature.

| Catalysts                                 | Peak power density (mW cm <sup>-2</sup> ) | Reference                                                 |
|-------------------------------------------|-------------------------------------------|-----------------------------------------------------------|
| Co-4ptz-K-M-800                           | 166                                       | This work                                                 |
| Co <sub>3</sub> HITP <sub>2</sub>         | 164                                       | <i>Angew. Chem. Int. Ed.</i> , <b>2019</b> , 59, 286–294. |
| Co/N-PCC                                  | 127.86                                    | <i>J. Catal.</i> , <b>2019</b> , 369, 143–156.            |
| Co-NC@Al <sub>2</sub> O <sub>3</sub>      | 72.4                                      | <i>Adv. Mater.</i> , <b>2018</b> , 30, 1805268.           |
| Co@N-CNTF                                 | 91                                        | <i>J. Mater. Chem. A</i> , <b>2019</b> , 7, 3664–3672.    |
| Co@NHCC-800                               | 248                                       | <i>Appl. Catal. B</i> , <b>2019</b> , 254, 55–65.         |
| Co-BTC-bipy-700                           | 336                                       | <i>Nano Energy</i> , <b>2019</b> , 61, 245–250.           |
| Co@Co <sub>3</sub> O <sub>4</sub> @NC-900 | 64                                        | <i>J. Mater. Chem. A</i> , <b>2018</b> , 6, 1443–1453.    |
| Co <sub>0.85</sub> Se@NC                  | 268                                       | <i>J. Mater. Chem. A</i> , <b>2017</b> , 5, 7001–7014.    |
